# Supplementary material
Source: PubMed Central journal article supplement (PMC3889555)
Supplement: MCB.01076-13_zmb999100222so4.pdf [file MCB.01076-13_zmb999100222so4.pdf]

## **FIGURE LEGENDS SUPPLEMENTARY FIGURES**

**Figure S1. A,** Western blot analysis of *Tgif1* expression in nuclear extracts of BM cells. **B,** Schematic of the flow cytometric analyses presented in this manuscript.

**Figure S2. A,** *Tgif1* mRNA expression in bone marrow cells transduced with MIG-control or MIG-*Tgif1* retroviruses as determined by qRT-PCR. **B.** Long-term reconstitution of transduced donor cells as determined by the number of GFP+ cells in peripheral blood of transplanted mice. Lin- cells from *Tgif1*<sup>+/+</sup> BM (CD45.2+) were transduced with MIG-control or MIG-*Tgif1* retrovirus. After infection, transduced cells were mixed with B6-Ly5.2/Cr (CD45.1+) and injected intravenously into recipient mice. The reconstitution of transduced donor cells (GFP+) in peripheral blood was determined by flow cytometry at 12 and 16 weeks after transplant.

**Figure S3.** Quantitative real time-PCR (qRT-PCR) analysis of *Tgif2* expression. **A,** *Tgif2* mRNA levels in hematopoietic stem and progenitor cells. **B,** Analysis of *Tgif2* expression in *Tgif1*<sup>+/+</sup> and *Tgif1*<sup>-/-</sup> SLAM cells.
