# Supplementary material
Source: PubMed Central journal article supplement (PMC3889555)
Supplement: MCB.01076-13_zmb999100222so5.pdf [file MCB.01076-13_zmb999100222so5.pdf]

**Table S1.** Peripheral blood counts in *Tgif1*<sup>-/-</sup> (n=9) and *Tgif1*<sup>+/+</sup> (n=7) mice at 8-10 weeks

| Genotype                    | White Blood Count<br>(K/ $\mu$ l) | Neutrophils<br>(K/ $\mu$ l) | Lymphocytes<br>(K/ $\mu$ l) | Monocytes<br>(K/ $\mu$ l) | Hematocrit<br>(%) | Red Blood Cells<br>(M/ $\mu$ l) | Hemoglobin<br>(g/dL) | Platelets<br>(K/ $\mu$ l) |
|-----------------------------|-----------------------------------|-----------------------------|-----------------------------|---------------------------|-------------------|---------------------------------|----------------------|---------------------------|
| <i>Tgif1</i> <sup>+/+</sup> | 4.7 $\pm$ 0.41                    | 0.73 $\pm$ 0.07             | 3.71 $\pm$ 0.36             | 0.26 $\pm$ 0.03           | 23.8 $\pm$ 0.86   | 5.93 $\pm$ 0.21                 | 7.67 $\pm$ 0.31      | 300 $\pm$ 41              |
| <i>Tgif1</i> <sup>-/-</sup> | 4.8 $\pm$ 0.26                    | 0.81 $\pm$ 0.14             | 3.73 $\pm$ 0.24             | 0.30 $\pm$ 0.04           | 25.4 $\pm$ 1.54   | 6.23 $\pm$ 0.36                 | 8.19 $\pm$ 0.47      | 344 $\pm$ 33              |

Data are shown as mean  $\pm$  SEM.
