# Supplementary material
Source: PubMed Central journal article supplement (PMC3889555)
Supplement: MCB.01076-13_zmb999100222so6.pdf [file MCB.01076-13_zmb999100222so6.pdf]

**Table S2.** Significantly regulated genes in *Tgif1*<sup>-/-</sup> LSK cells compared to WT cells

| Gene             | log2(fold_change) | p_value     |
|------------------|-------------------|-------------|
| <i>Dlgap1</i>    | 6.54977 ↑         | 0           |
| <i>Gm14569</i>   | 3.85824 ↑         | 0.000260807 |
| <i>Rbm44</i>     | 3.84839 ↑         | 7.38E-05    |
| <i>Adamtsl1</i>  | 3.10991 ↑         | 1.19E-05    |
| <i>Myom1</i>     | 2.67104 ↑         | 0           |
| <i>Ehd3</i>      | 2.65083 ↑         | 3.75E-13    |
| <i>Clip4</i>     | 2.17243 ↑         | 3.80E-05    |
| <i>Prg2</i>      | 1.5631 ↑          | 1.44E-06    |
| <i>Prss34</i>    | 1.54622 ↑         | 3.60E-09    |
| <i>Mcpt8</i>     | 1.46645 ↑         | 8.44E-07    |
| <i>Csrp3</i>     | 1.41538 ↑         | 6.49E-05    |
| <i>Ms4a2</i>     | 1.33086 ↑         | 2.61E-07    |
| <i>Alox5</i>     | 1.32917 ↑         | 5.17E-06    |
| <i>Cdh1</i>      | 1.30536 ↑         | 0           |
| <i>H2-Eb1</i>    | 1.20058 ↑         | 3.47E-08    |
| <i>Camk2b</i>    | 1.15578 ↑         | 0.000317964 |
| <i>Cpa3</i>      | 1.13074 ↑         | 4.65E-07    |
| <i>Loh12cr1</i>  | 0.603991 ↑        | 6.15E-12    |
| <i>Vldlr</i>     | 0.551017 ↑        | 0.000199505 |
| <i>Rab27b</i>    | 0.512142 ↑        | 6.58E-05    |
| <i>Rab3il1</i>   | 0.50529 ↑         | 2.39E-05    |
| <i>Serpina3g</i> | 0.378096 ↑        | 2.00E-05    |
| <i>Znhit3</i>    | 0.354525 ↑        | 0.000107306 |
| <i>Tlr3</i>      | 0.345054 ↑        | 5.48E-05    |
| <i>Acs15</i>     | 0.32131 ↑         | 4.80E-05    |
| <i>H2-Ke6</i>    | 0.310791 ↑        | 0           |
| <i>Sub1</i>      | 0.305235 ↑        | 8.74E-05    |
| <i>Gm13152</i>   | 0.293029 ↑        | 8.22E-07    |
| <i>Srgap3</i>    | 0.201142 ↑        | 2.85E-05    |
| <i>Eef1d</i>     | 0.199199 ↑        | 0.00018452  |
| <i>Nsfl1c</i>    | 0.130778 ↑        | 3.66E-08    |
| <i>Asxl2</i>     | -0.152133 ↓       | 5.26E-05    |
| <i>Pde4b</i>     | -0.155155 ↓       | 7.07E-06    |
| <i>Gne</i>       | -0.206026 ↓       | 0.000105221 |
| <i>Fam134b</i>   | -0.214723 ↓       | 6.64E-05    |
| <i>Mier3</i>     | -0.220555 ↓       | 0.00019282  |
| <i>Tcf4</i>      | -0.252971 ↓       | 4.09E-06    |
| <i>Amot</i>      | -0.273747 ↓       | 2.04E-06    |
| <i>Shprh</i>     | -0.280798 ↓       | 3.40E-05    |
| <i>Nek1</i>      | -0.282596 ↓       | 2.56E-06    |
| <i>Rfx5</i>      | -0.310494 ↓       | 0.000213046 |

|                      |             |             |
|----------------------|-------------|-------------|
| <i>Dgke</i>          | -0.31737 ↓  | 3.06E-12    |
| <i>AW555464</i>      | -0.448311 ↓ | 1.42E-12    |
| <i>Egfl7</i>         | -0.452535 ↓ | 2.20E-11    |
| <i>5031439G07Rik</i> | -0.495136 ↓ | 0.000269982 |
| <i>Sstr2</i>         | -0.56391 ↓  | 4.63E-06    |
| <i>Trp53i11</i>      | -0.583361 ↓ | 8.04E-07    |
| <i>Traf4</i>         | -0.743246 ↓ | 1.93E-05    |
| <i>Arpp21</i>        | -0.768479 ↓ | 1.84E-07    |
| <i>Kcnip3</i>        | -0.813632 ↓ | 0.000285503 |
| <i>Dcaf12l1</i>      | -0.848529 ↓ | 1.13E-07    |
| <i>P2rx7</i>         | -0.862123 ↓ | 0.000102664 |
| <i>Mid1</i>          | -0.906461 ↓ | 3.21E-06    |
| <i>Hmga2</i>         | -0.930693 ↓ | 1.00E-08    |
| <i>Emp1</i>          | -1.05655 ↓  | 4.03E-05    |
| <i>Lef1</i>          | -1.09545 ↓  | 5.30E-05    |
| <i>Gfra1</i>         | -1.3313 ↓   | 5.73E-05    |
| <i>AA467197</i>      | -1.33732 ↓  | 7.18E-05    |
| <i>Gfra2</i>         | -1.36547 ↓  | 1.43E-11    |
| <i>Cd79a</i>         | -1.40518 ↓  | 3.91E-05    |
| <i>Akap12</i>        | -1.42525 ↓  | 0.000215173 |
| <i>Siglecg</i>       | -1.43278 ↓  | 0.000189553 |
| <i>Blnk</i>          | -1.47553 ↓  | 1.17E-09    |
| <i>Zfp618</i>        | -1.47679 ↓  | 6.69E-05    |
| <i>Igll1</i>         | -1.69174 ↓  | 0           |
| <i>Foxa3</i>         | -1.69648 ↓  | 7.34E-05    |
| <i>Ebf1</i>          | -2.12977 ↓  | 2.30E-05    |
| <i>Cecr2</i>         | -2.1374 ↓   | 3.46E-06    |
| <i>Tmem121</i>       | -2.17906 ↓  | 0.000115678 |
| <i>Nuak1</i>         | -2.98161 ↓  | 0.000149374 |

Analysis was done by RNA-seq. ↑= upregulated and ↓= downregulated in *Tgif*<sup>-/-</sup> LSK cells.
