# Supplementary material
Source: PubMed Central journal article supplement (PMC3889555)
Supplement: MCB.01076-13_zmb999100222so7.pdf [file MCB.01076-13_zmb999100222so7.pdf]

**Table S3.** Function of genes differentially expressed in *Tgif1*<sup>+/+</sup> and *Tgif1*<sup>-/-</sup> LSK cells

| <b>Genes</b>                                                                                                                                                                                                                    | <b>Functions</b>                              |
|---------------------------------------------------------------------------------------------------------------------------------------------------------------------------------------------------------------------------------|-----------------------------------------------|
| <i>TCF4, RFX5, CD79A, BLNK, IGLL1/IGLL5, EBF1</i>                                                                                                                                                                               | Progenitor cell function                      |
| <i>AKAP12, ALOX5, Camk2b, HMGA2, GFRA1, BLNK, LEF1, SSTR2, TCF4</i>                                                                                                                                                             | Cell Cycle                                    |
| <i>AKAP12, ALOX5, BLNK, Camk2b, GFRA1, HMGA2, LEF1, SSTR2, TCF4</i>                                                                                                                                                             | Cell Cycle G <sub>0</sub>                     |
| <i>ACSL5, AKAP12, ALOX5, AMOT, BLNK, CD79A, EEF1D, EMP1, FOXA3, GFRA1, GFRA2, GNE, HLA-DRB1, HMGA2, IGLL1/IGLL5, KCNIP3, LEF1, MS4A2, P2RX7, PRG2, SIGLEC10, SSTR2, TCF4, TLR3, TP53I11, VLDLR</i>                              | Proliferation of hematopoietic cells          |
| <i>ACSL5, AKAP12, ALOX5, AMOT, BLNK, CD79A, CECR2, EBF1, EEF1D, EMP1, FAM134B, GFRA1, GFRA2, GNE, HLA-DRB1, HMGA2, KCNIP3, LEF1, MS4A2, NEK1, NUAK1, P2RX7, PDE4B, PRG2, SSTR2, SUB1 (includes EG:10923), TCF4, TLR3, TRAF4</i> | Cell Death and survival                       |
| <i>BLNK, GFRA1, IGLL1/IGLL5, TLR3</i>                                                                                                                                                                                           | Development and differentiation of leukocytes |
