# Supplementary material
Source: PubMed Central journal article supplement (PMC3889555)
Supplement: MCB.01076-13_zmb999100222so8.pdf [file MCB.01076-13_zmb999100222so8.pdf]

**Table S4. Enriched gene sets in *Tgif1*-null mice in GSEA analysis of RNA-seq data**

| <b>Gene Sets</b>                      | <b>NES</b> | <b>p-Value</b> | <b>FDR</b> |
|---------------------------------------|------------|----------------|------------|
| BROWN_MYELOID_PROLIF_AND_SELF_RENEWAL | 1.41       | 0.021          | 0.25       |
| BLOOD_CLOTTING_CASCADE                | 1.37       | 0.06           | 0.21       |
| INTRINSICPATHWAY                      | 1.3        | 0.1            | 0.18       |
| MA_ATRA_EMP_UP                        | 1.3        | 0.1            | .22        |
| CTTTGA_V\$LEF1_Q2                     | 1.44       | 0.00           | 0.12       |
| ENDOPEPTIDASE_ACTIVITY                | 1.48       | 0.05           | 0.09       |
| PEPTIDASE_ACTIVITY                    | 1.43       | 0.04           | 0.06       |
| WOUND_HEALING                         | 1.48       | 0.06           | 0.08       |
| REGULATION_OF_BODY_FLUID_LEVELS       | 1.46       | 0.07           | 0.06       |
| SERINE_TYPE_ENDOPEPTIDASE_ACTIVITY    | 1.47       | 0.03           | 0.07       |
| HEMOSTASIS                            | 1.49       | 0.04           | 0.24       |
| COAGULATION                           | 1.47       | 0.07           | 0.25       |
| REGULATION OF BIOLOGICAL QUALITY      | 1.49       | 0.04           | 0.12       |
| RESPONSE_TO_STRESS                    | 1.49       | 0.04           | 0.22       |
