# Supplementary material
Source: PubMed Central journal article supplement (PMC3889555)
Supplement: MCB.01076-13_zmb999100222so9.pdf [file MCB.01076-13_zmb999100222so9.pdf]

**Table S5.** Results of Ingenuity pathway analysis

| <b>Diseases and Disorders</b>       | <b>Molecular and Cellular Functions</b> | <b>Physiological System Development and Function</b> |
|-------------------------------------|-----------------------------------------|------------------------------------------------------|
| Hematological Disease               | Cell Death and Survival                 | Hematological System Development and Function        |
| Hereditary Disorder                 | Cell Morphology                         | Hematopoiesis                                        |
| Immunological Disease               | Cellular Development                    | Humoral Immune Response                              |
| Organismal Injury and Abnormalities | Cell-To-Cell Signaling and Interaction  | Tissue Morphology                                    |
| Gastrointestinal Disease            | Cell Cycle                              | Lymphoid Tissue Structure and Development            |
