# Supplementary material
Source: PubMed Central journal article supplement (PMC3889555)
Supplement: MCB.01076-13_zmb999100222so10.pdf [file MCB.01076-13_zmb999100222so10.pdf]

**Table S6.** Gene networks identified in Ingenuity Pathway Analysis

|   | <b>Molecules in Network</b>                                                                                                                                                                                                                                                                                                                                                                                        | <b>Score</b> | <b>Top Functions</b>                          |
|---|--------------------------------------------------------------------------------------------------------------------------------------------------------------------------------------------------------------------------------------------------------------------------------------------------------------------------------------------------------------------------------------------------------------------|--------------|-----------------------------------------------|
| 1 | <b>AKAP12, ALOX5, ARPP21, BLNK</b> , CD3, <b>CD79A, CDH1</b> , Creb, CSRP3, <b>EBF1, EMP1</b> , ERK1/2, <b>GFRA1</b> , GFRA2, Histone h3, <b>HLA DRB1</b> , IgG1, IgG, <b>IGLL1/IGLL5</b> , IgM, Immunoglobulin, <b>LEF1</b> , MHC Class II (complex), <b>MID1 (includes EG:100330952)</b> , <b>P2RX7</b> , P38 MAPK, <b>PDE4B, RFX5</b> , SCRT1, <b>SIGLEC10</b> , SYK/ZAP, <b>TCF4</b> , TCR, <b>TLR3</b> , Vegf | 52           | Hematological System Development and Function |
| 2 | BEGAIN, CDH3, <b>CECR2, CLIP4</b> , CTNNAL1, D glucose, DDR1, <b>DGKE, EGFL7</b> , EHBP1, EHD1, <b>EHD3</b> , Histone h3, IGF1R, IP6K1, <b>KIAA0284, KIAA0930</b> , LOXL4, LRPPRC, <b>Mcpt8, NEK1</b> , NEURL4, PACSIN2, <b>PRG2</b> , PTPRF, <b>RAB3IL1</b> , RALY, <b>SHPRH</b> , SMARCA5, SNAP29, <b>TP53I11</b> , UBC, UQCRC1, XRCC3, <b>ZNHIT3</b>                                                            | 29           | Organ Morphology, Development and Function    |
| 3 | <b>AKAP12, ASXL2</b> , BANP, <b>C15orf48</b> , CDKN1A, CLCA2, <b>CPA3</b> , DDR1, <b>DLGAP1</b> , EZH2, FER, <b>FOXA3</b> , indican, ITSN1, KIT, MAPK1, <b>MYOM1</b> , MZF1, <b>NUAK1</b> , PTPRU, PVRL1, <b>RAB27B, Serpina3g</b> (includes others), SHANK2, SHANK3, SMARCA4, SRF, <b>SRGAP3</b> , STAT3, TACC3, TBX1, TEC/BTK/ITK/TXK/BMX, TP53 (includes EG:22059), TTK                                         | 21           | Cell Cycle                                    |
| 4 | <b>AMOT</b> , ARG1, <b>Camk2b</b> , CBR4, CPEB3, CREBBP, CTNND2, DPAGT1, DYNLL2, <b>EEF1D</b> , FCGR3A, FER, GAD2, GRIN2A, GRIP1, <b>HSD17B8</b> , HTATIP2, IFNG (includes EG:15978), IL10, LAT2, LATS1, <b>LOH12CR1</b> , LRPPRC, MLANA, MPP7, <b>MS4A2</b> , NEURL, NFKBID, <b>NSFL1C</b> , PHF23, RAD21, SREBF1, <b>SSTR2</b> , UBC, <b>VLDLR</b>                                                               | 17           | Gene Expression                               |
| 5 | AANAT, <b>ACSL5</b> , Akt, B-cell receptor, <b>BLNK</b> , Ccl9, CD72 (includes EG:100427076), Cg, Ck2, D glucose, ERK, <b>GNE</b> , GRIN1, Histone h3, HMGA2, I18r, indican, ITSN1, Jnk, <b>KCNIP3</b> , NFkB (complex), NOS1, <b>NUAK1</b> , PI3K (complex), Pkc(s), PPP4R4, PRKD3, <b>Prss34</b> , RNA polymerase II, SLPI, SORBS2, <b>SUB1</b> (includes EG:10923), TBC1D4, TEC/BTK/ITK/TXK/BMX, <b>TRAF4</b>   | 17           | Cell Death and Survival                       |

Bold font indicates genes that are found to be up- or down-regulated in RNAseq data; non-bold genes are directly associated with bold genes.
