# Supplementary material
Source: PubMed Central journal article supplement (PMC3889555)

**FIG S1**

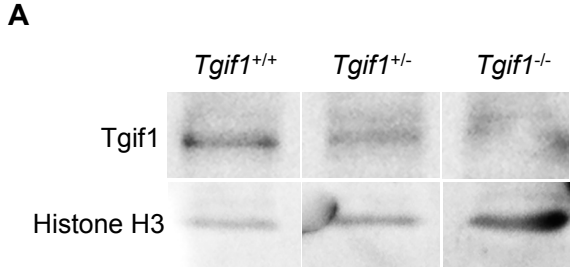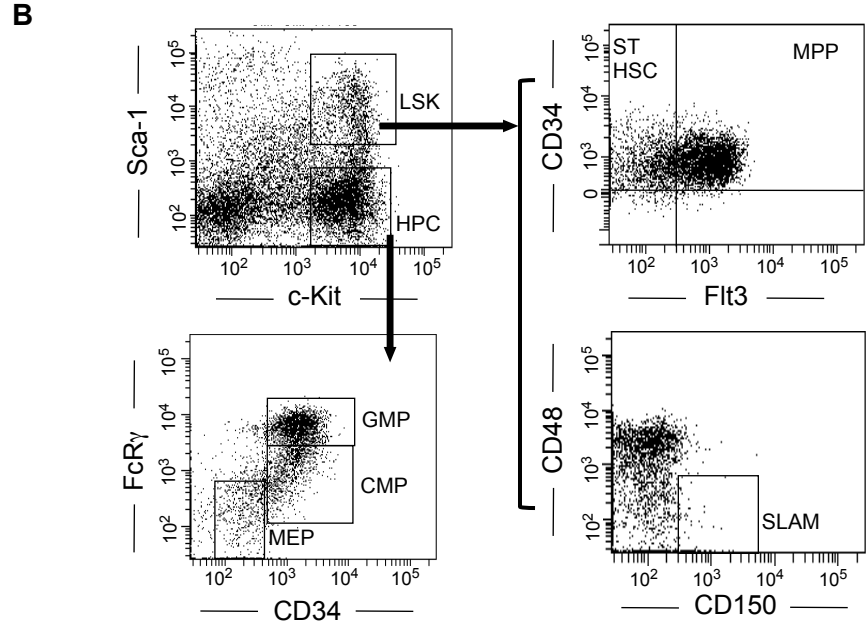

Supplement: MCB.01076-13_zmb999100222so1.pdf [file MCB.01076-13_zmb999100222so1.pdf]

**FIG S2**

**A**

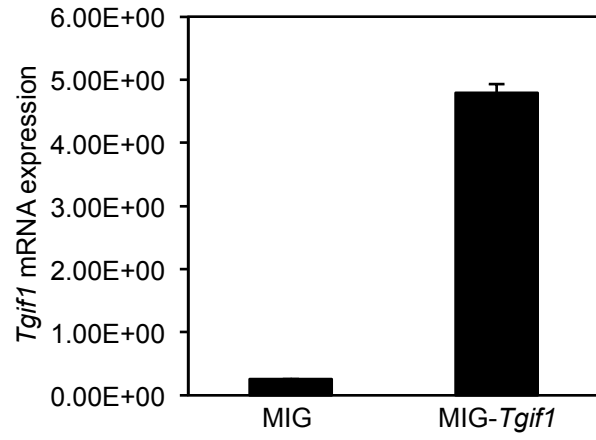

**B**

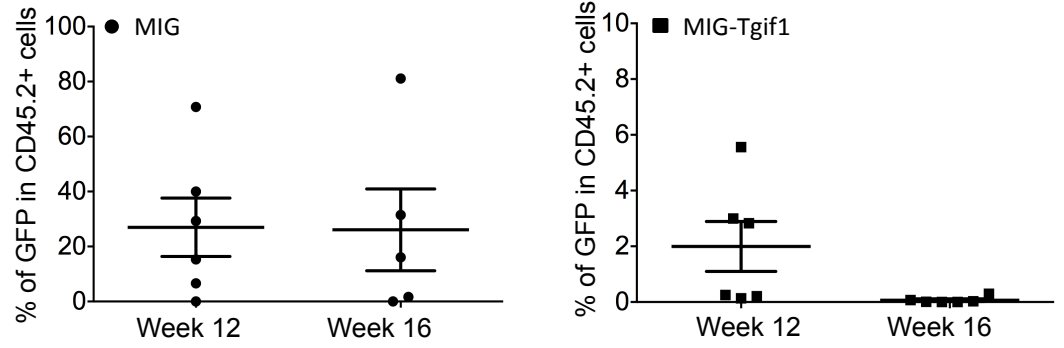

Supplement: MCB.01076-13_zmb999100222so2.pdf [file MCB.01076-13_zmb999100222so2.pdf]

**FIG S3**

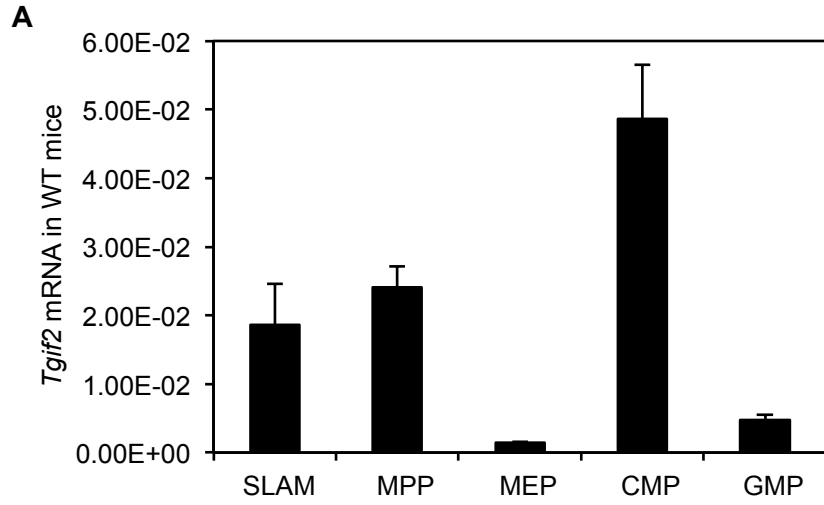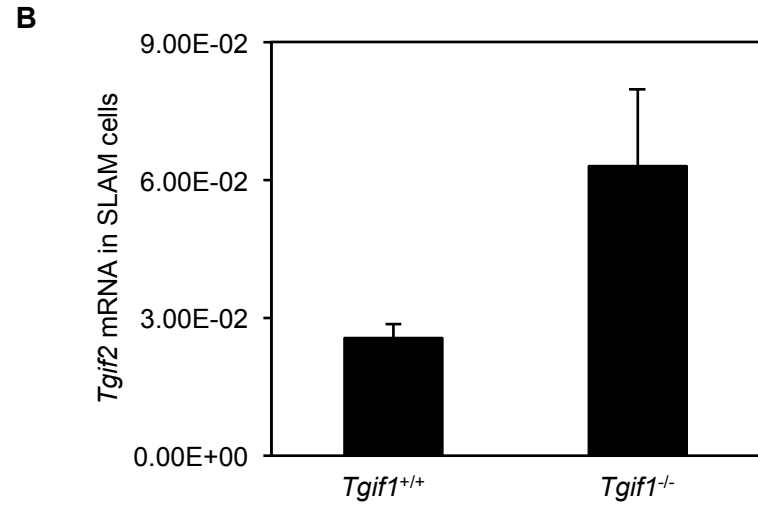

Supplement: MCB.01076-13_zmb999100222so3.pdf [file MCB.01076-13_zmb999100222so3.pdf]
